# Supplementary material for: Nanoscale lipid vesicles functionalized with a nitro-aniline derivative for photoinduced nitric oxide (NO) delivery
Source: Royal Society of Chemistry journal article supplement (doi:10.1039/c9na00532c), 2019-11-20
Supplement: c9na00532c1.pdf [file c9na00532c1.pdf]

## Supporting Information for:

### Nanoscale lipid vesicles functionalized with nitro-aniline derivative for photoinduced nitric oxide (NO) delivery

Nancy Sharma<sup>a</sup>, Ajay Kumar Dhyani<sup>b</sup>, Srujan Marepally<sup>b</sup> and D. Amilan Jose<sup>a\*</sup>

<sup>a</sup>Department of Chemistry, NIT-Kurukshetra, Kurukshetra-136119, Haryana, India.

<sup>b</sup>Laboratory of Nanobioscience and Nanobiotechnology, Center for Stem Cell Research (CSCR), (a Unit of in Stem, Bengaluru), Christian Medical College Campus, Vellore-632002, Tamil Nadu, India

E-mail: [amilanjosenit@nitkkr.ac.in](mailto:amilanjosenit@nitkkr.ac.in)

#### Table of Content

**Figure S1:** <sup>1</sup>H-NMR spectrum of **AMP-NTA**

**Figure S2:** <sup>13</sup>C-NMR spectrum of **AMP-NTA**

**Figure S3:** <sup>19</sup>F-NMR spectrum of **AMP-NTA**

**Figure S4:** ESI and HR- Mass spectrum of **AMP-NTA**

**Figure S5:** Particle Size analysis of (A) before and (B) after irradiation of **Ves-NTA** with light at 410 nm

**Figure S6:** UV-vis absorption spectra of the formation of Azo-dye when Griess reagent (100 µL) was treated with NaNO<sub>2</sub>.

**Figure S7:** Standardisation curve of griess assay with different concentrations of NaNO<sub>2</sub> (5µM - 50µM) to quantify the amount of NO released from **Ves-NTA**.

**Figure S8:** Griess Assay with different concentrations of **AMP-NTA** (A) 5µM (B) 12.5µM (C) 25µM (D) 37.5µM (E) 50 µM present in **Ves-NTA** with the addition of 500 µl of Griess reagent (800mg/20ml)

**Figure S9:** Time dependent changes in absorbance at λ = 500 nm for **Ves-NTA** upon irradiation with light . (The plot used for the determination of rate of NO release (K<sub>NO</sub>) for **Ves-NTA**)

**Figure S10:** UV-Vis spectrum for the formation of azo-dye when Griess reagent (20µl) was treated with **AMP-NTA** (35 µM) in presence of light.

**Figure S11:** Time dependent changes in absorbance at λ = 500 nm for **AMP-NTA** upon irradiation with light .

**Figure S12:** Effect of temperature on the rate of NO release monitored by Griess assay.

**Table S1:** Effect of temperature on the rate of NO release

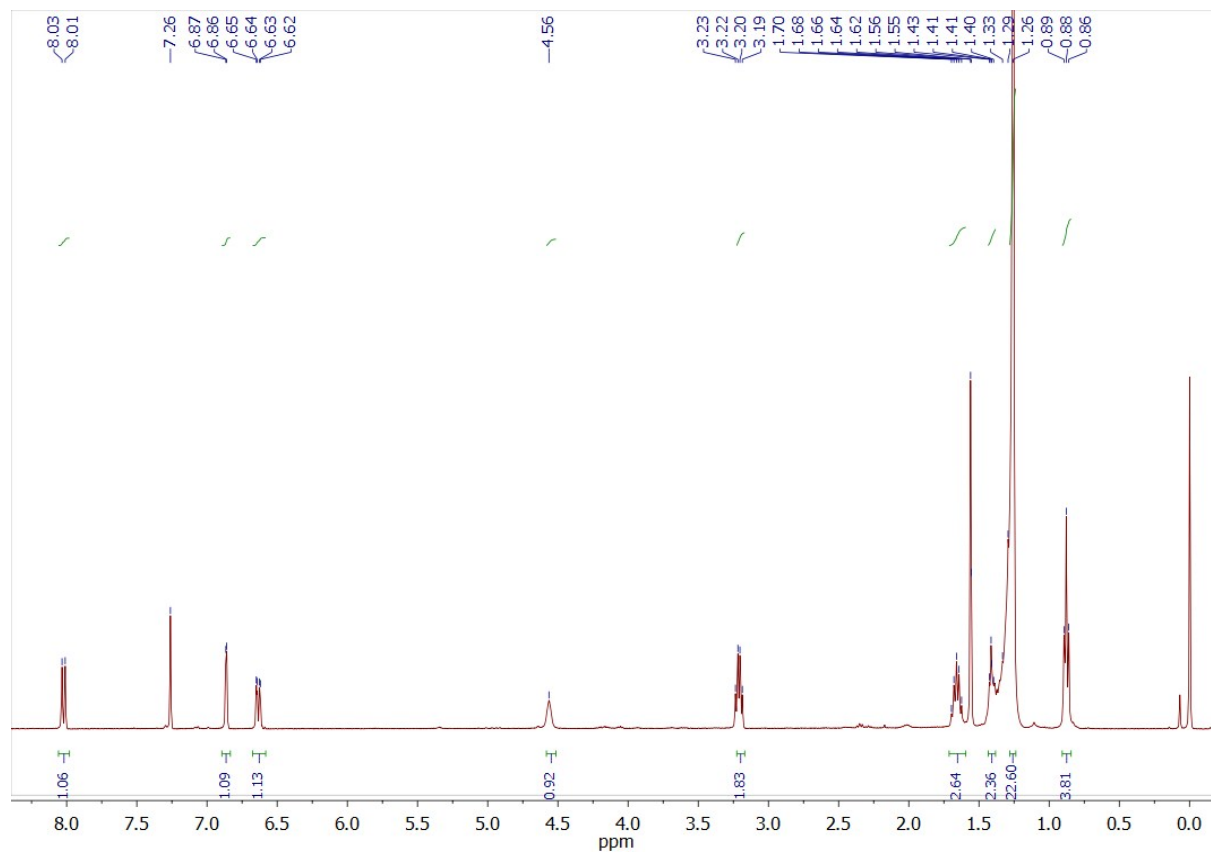

**Figure S1:**  $^1\text{H}$ -NMR spectrum of AMP-NTA

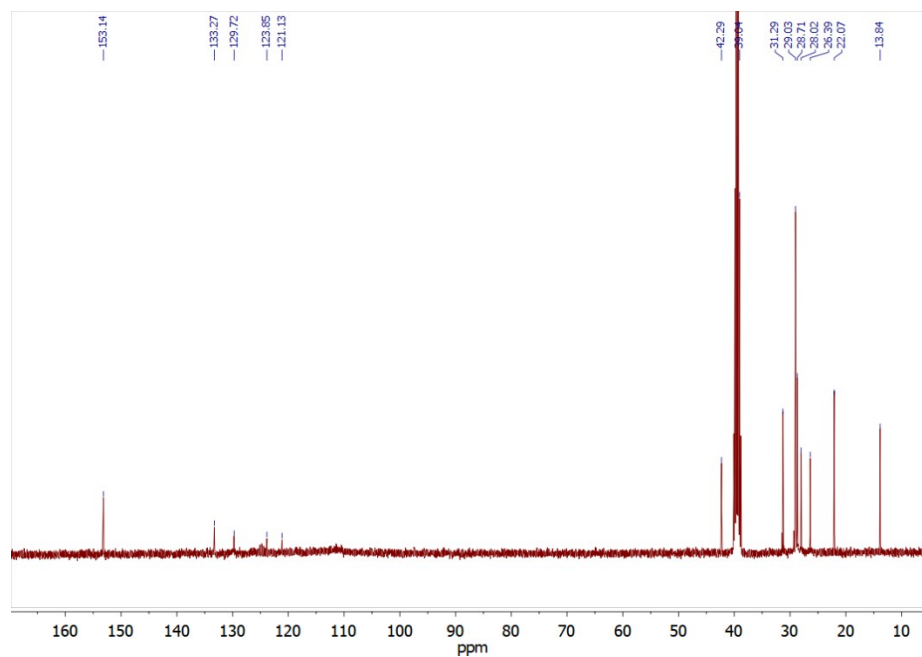

**Figure S2:**  $^{13}\text{C}$ -NMR spectrum of AMP-NTA

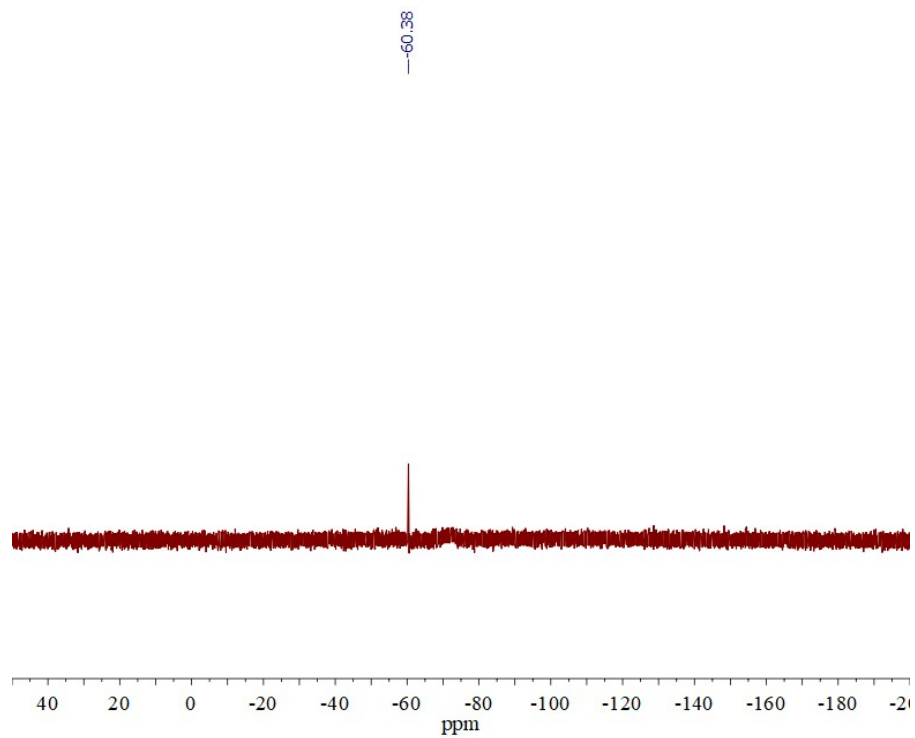

**Figure S3:**  $^{19}\text{F}$ -NMR spectrum of AMP-NTA

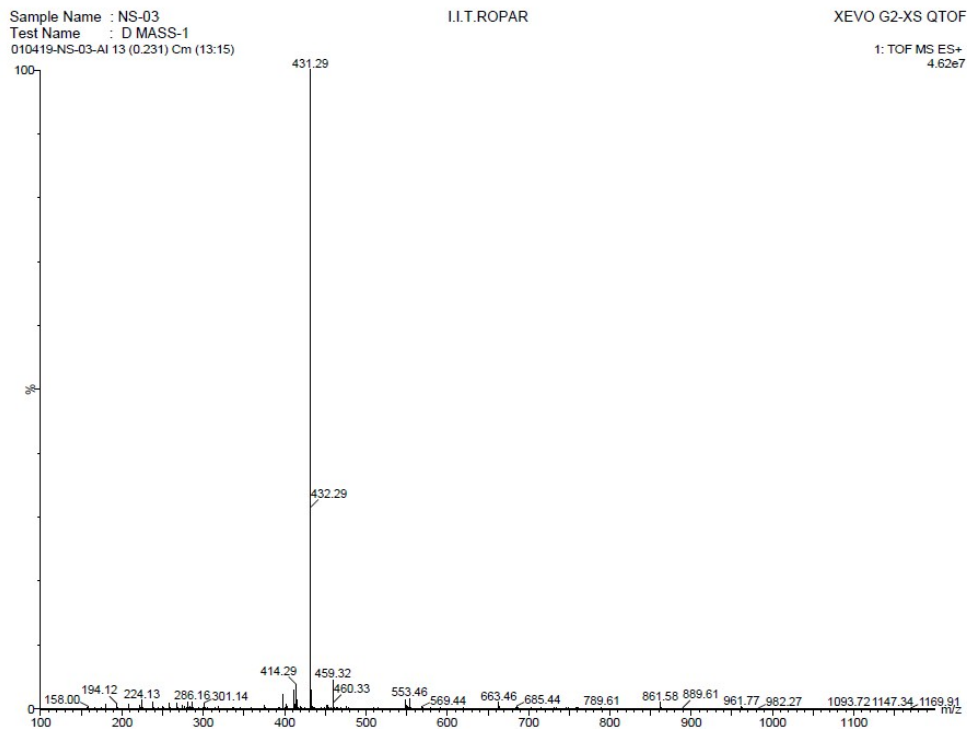

Monoisotopic Mass, Even Electron Ions

30 formula(e) evaluated with 1 results within limits (up to 50 best isotopic matches for each mass)

Elements Used:

C: 11-25 H: 11-40 N: 0-2 O: 1-3 F: 0-3

Sample Name : NS-03

IITRPR

XEVO G2-XS QTOF

Test Name : HRMS-1

241019-NS-03 15 (0.157) AM2 (Ar,22000.0,0.00,0.00); Cm (15:24)

1: TOF MS ES+  
1.68e+008

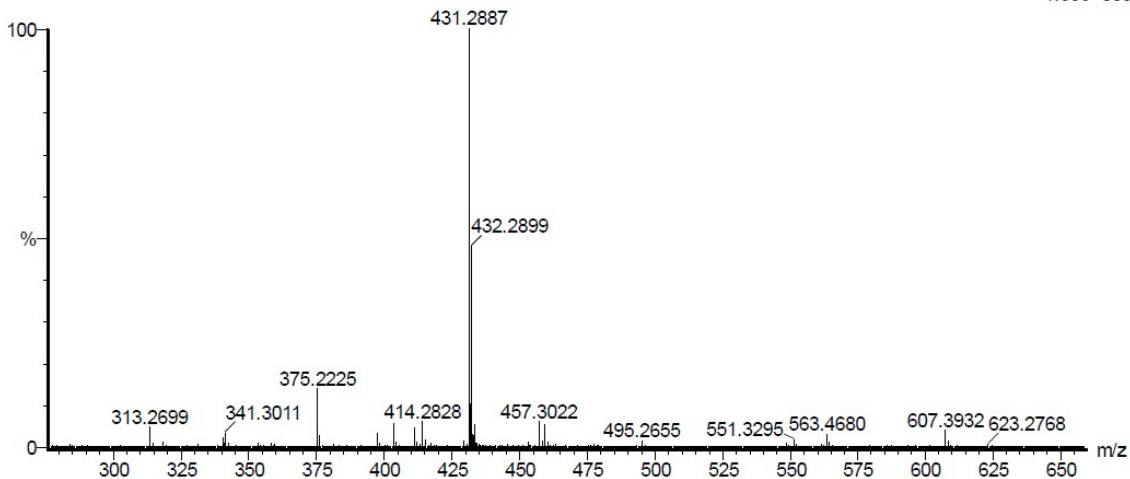

Minimum: -1.5  
 Maximum: 5.0 25.0 50.0

| Mass     | Calc. Mass | mDa | PPM | DBE | i-FIT  | Norm | Conf (%) | Formula          |
|----------|------------|-----|-----|-----|--------|------|----------|------------------|
| 431.2887 | 431.2885   | 0.2 | 0.5 | 4.5 | 1053.1 | n/a  | n/a      | C23 H38 N2 O2 F3 |

**Figure S4:** (a) ESI- Mass spectrum of AMP-NTA (b) HR- Mass spectrum of AMP-NTA

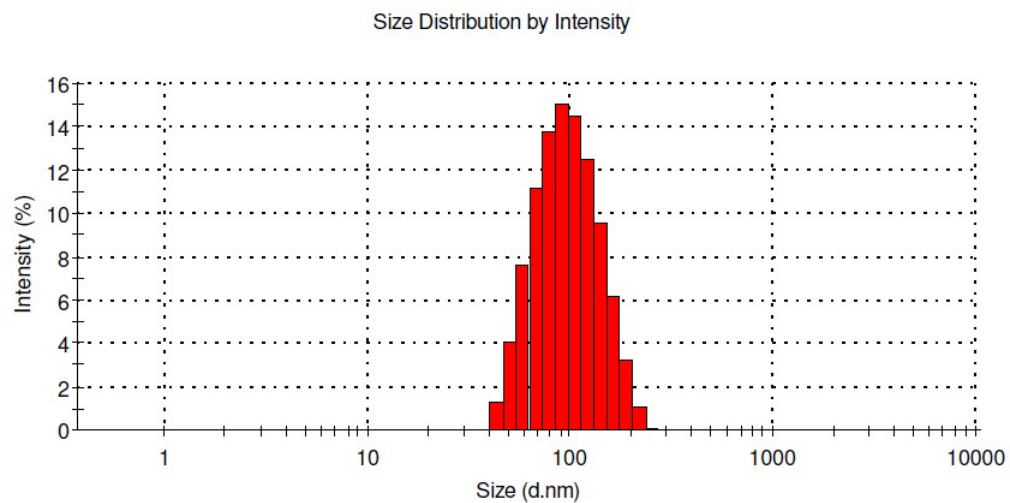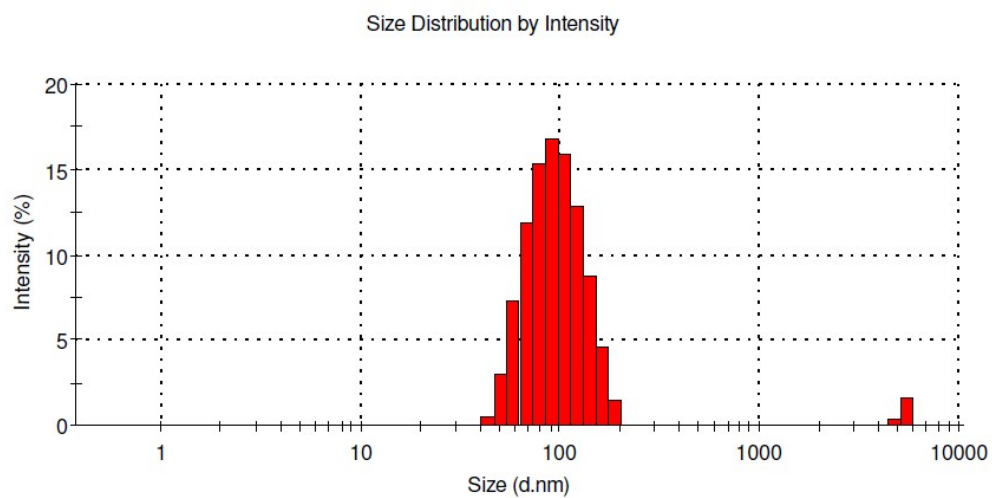

**Figure S5:** Particle Size analysis of (A) before and (B) after irradiation of Ves-NTA with light at 410 nm.

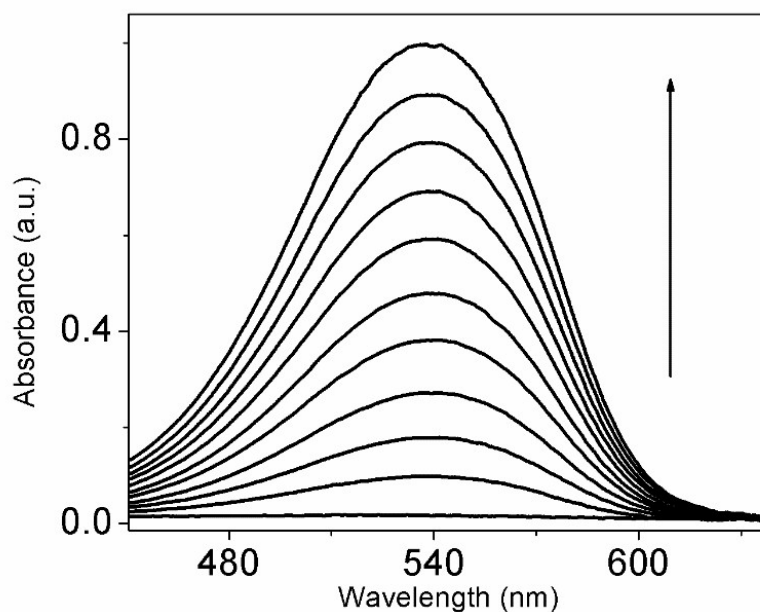

**Figure S6:** UV-vis absorption spectra of the formation of Azo-dye when Griess reagent (100  $\mu$ L) was treated with  $\text{NaNO}_2$ .

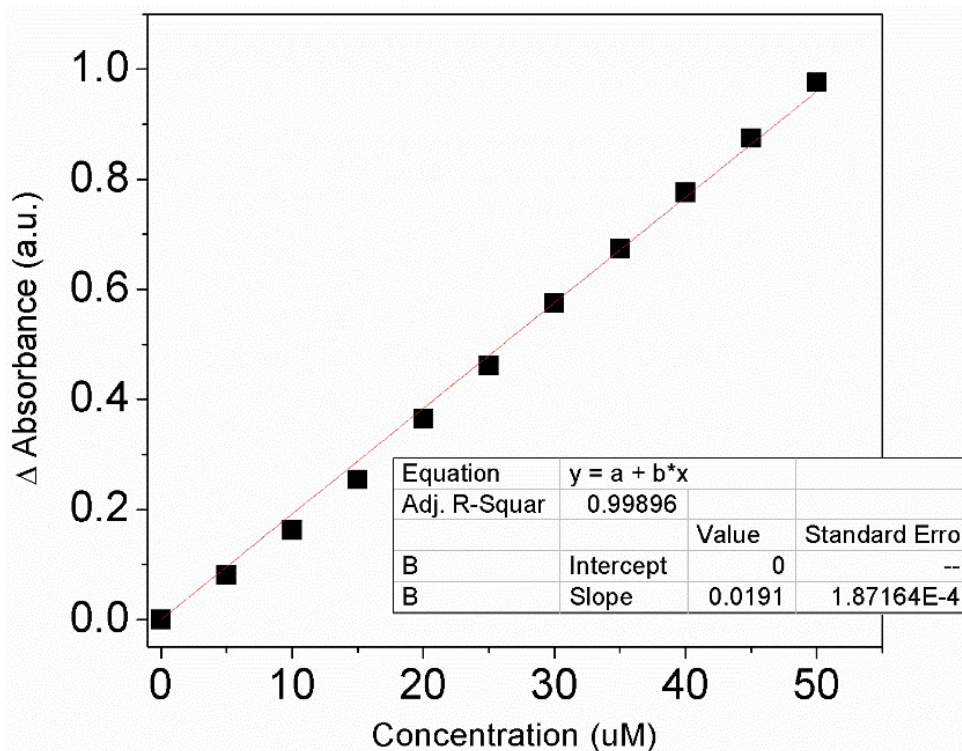

**Figure S7.** Standardisation curve of griess assay with different concentrations of  $\text{NaNO}_2$  (5  $\mu$ M - 50  $\mu$ M) to quantify the amount of NO released from **Ves-NTA**.

(A)

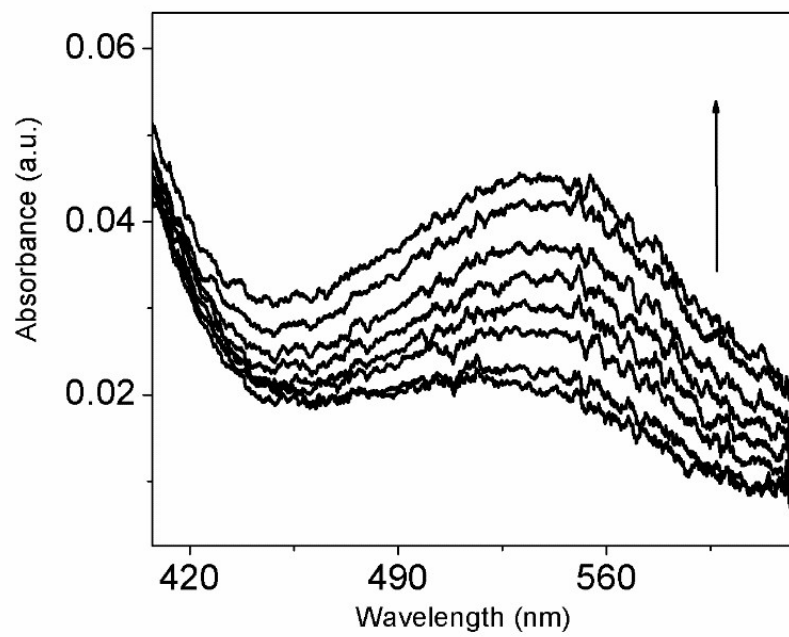

(B)

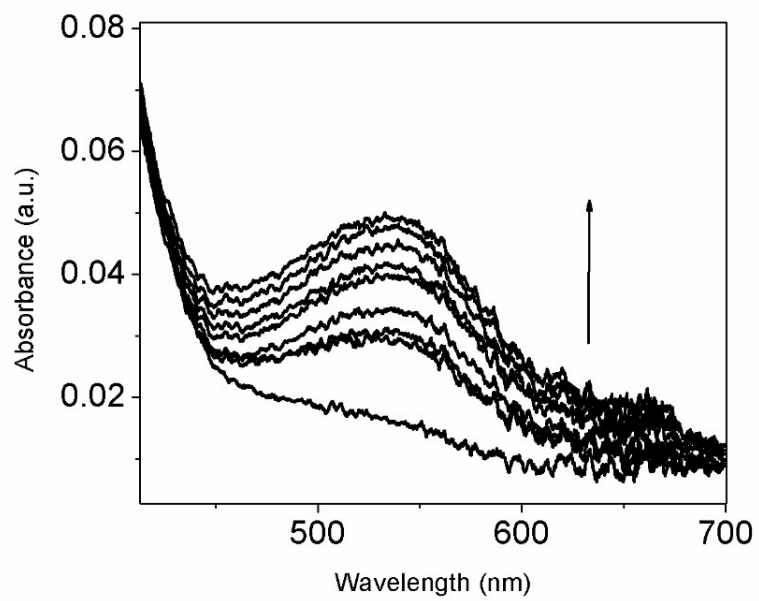

(C)

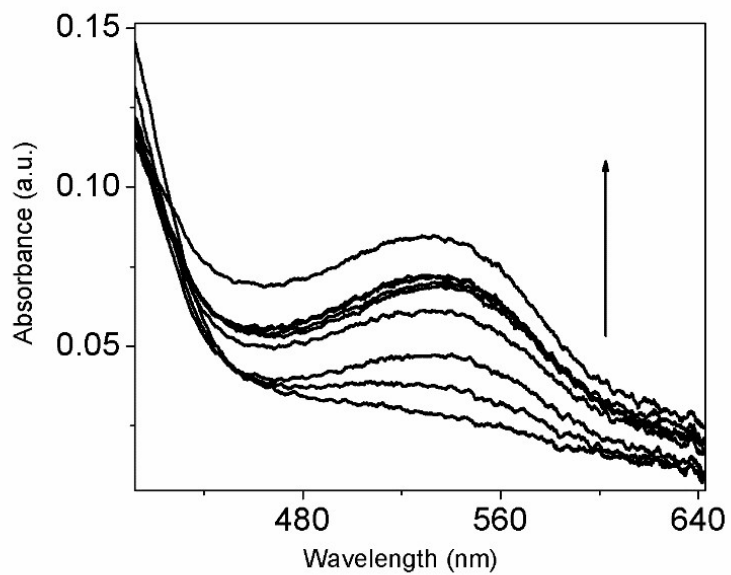

(D)

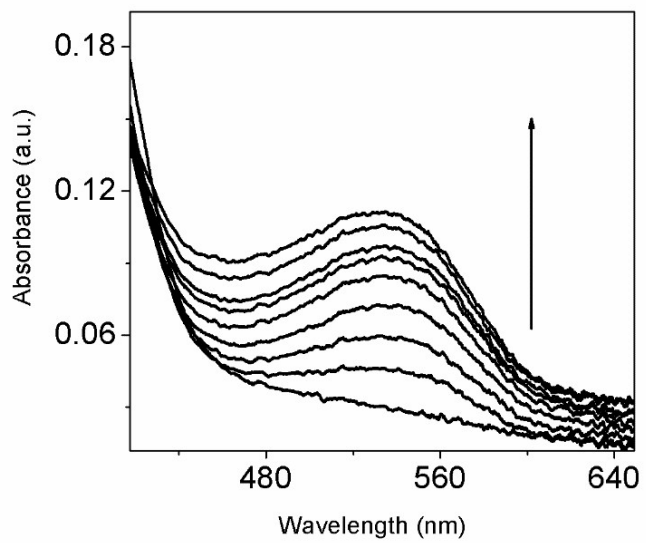



(E)

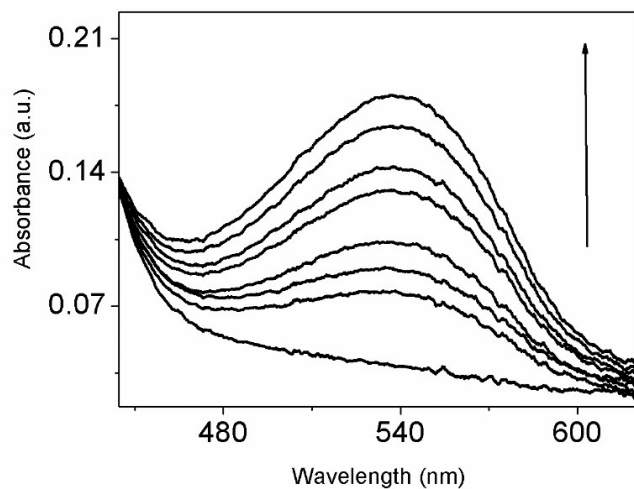

**Figure S8.** Greiss Assay with different concentrations of AMP-NTA (A) 5 $\mu$ M (B) 12.5 $\mu$ M (C) 25 $\mu$ M (D) 37.5 $\mu$ M (E) 50  $\mu$ M present in Ves-NTA with the addition of 500  $\mu$ l of Greiss reagent (800mg/20ml).

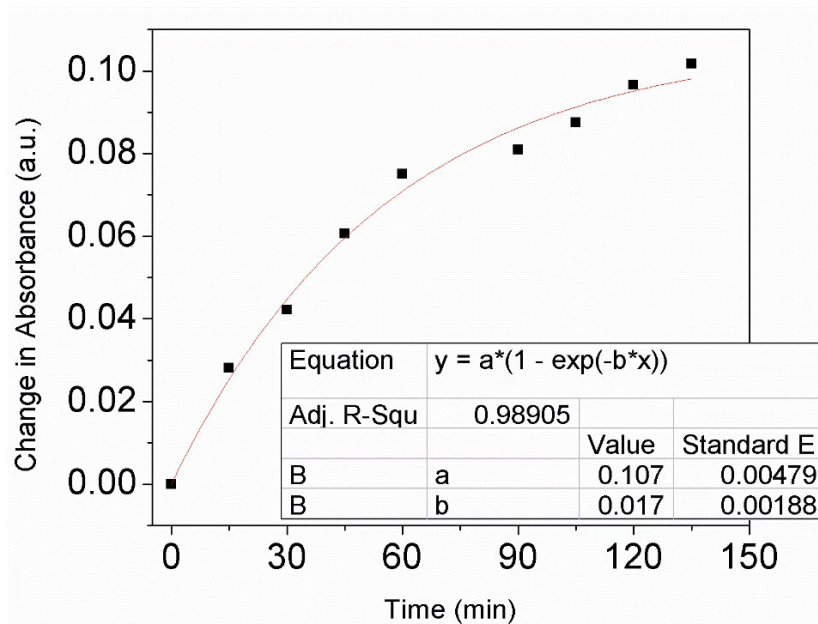

**Figure S9:** Time dependent changes in absorbance at  $\lambda = 500$  nm for Ves-NTA upon irradiation with light . (The plot used for the determination of rate of NO release ( $K_{NO}$ ) for Ves-NTA)

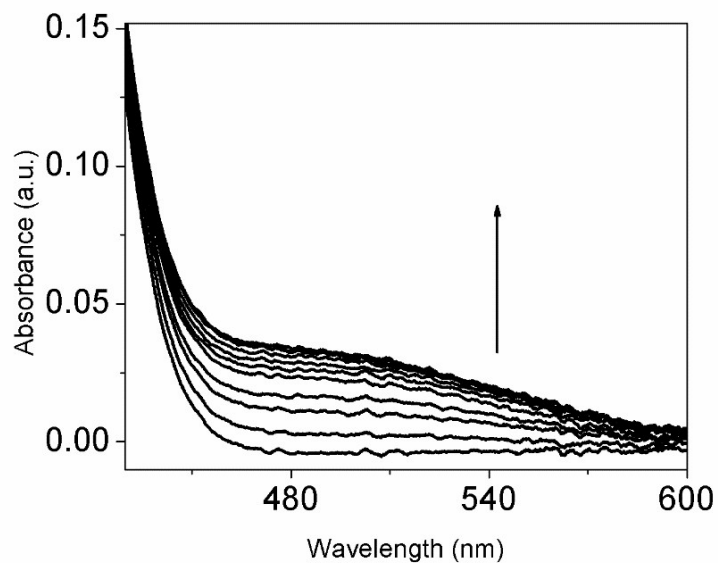

**Figure S10:** UV-Vis spectrum for the formation of azo-dye when Griess reagent (20  $\mu$ l) was treated with AMP-NTA (35 $\mu$ M) in presence of light.

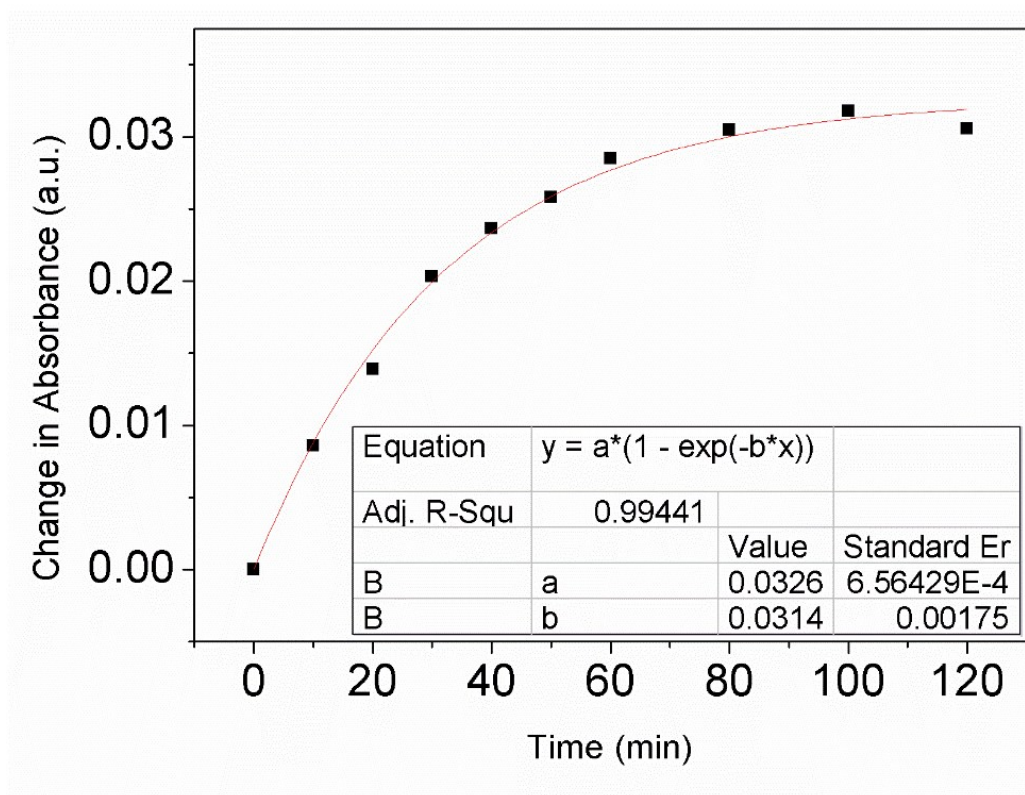

**Figure S11:** Time dependent changes in absorbance at  $\lambda = 500$  nm for AMP-NTA upon irradiation with light .

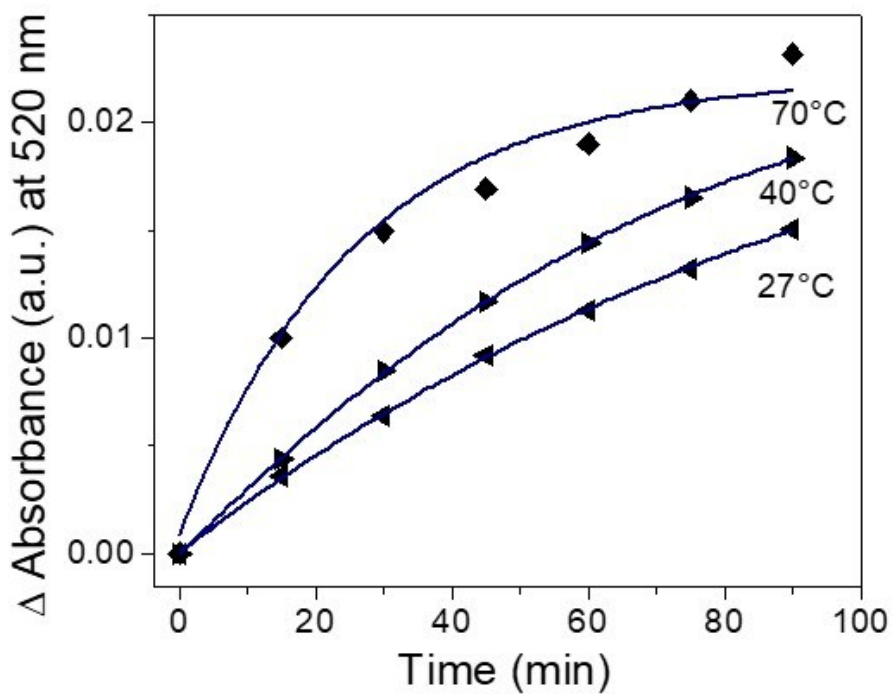

**Figure S12:** Effect of temperature on the rate of NO release monitored by Griess assay.

**Tabel S1:** Effect of temperature on the rate of NO release.

| S.No | Temperature | Rate of NO release ( $K_{NO}$ ) | Half-Life ( $t_{1/2}$ ) mins |
|------|-------------|---------------------------------|------------------------------|
| 1    | 27°C        | 0.0090                          | 77                           |
| 2    | 40°C        | 0.0119                          | 58                           |
| 3    | 70°C        | 0.0420                          | 17                           |
